# Supplementary material for: Parental attitudes and perceptions associated with childhood vaccine exemptions in high-exemption schools
Source: PubMed Central journal article supplement (PMC6002085; doi:10.1371/journal.pone.0198655), 2018-06-14
Supplement: pone.0198655.s002.pdf [file pone.0198655.s002.pdf]

1. What language would you prefer to use for this survey?

English

Spanish



6. On a scale of 1-5, where 1 is 'strongly disagree' and 5 is 'strongly agree', how much do you agree with the following statements? Check one per question.

|                                                                                   | 1 - Strongly disagree | 2 - Disagree          | 3 - Not sure          | 4 - Agree             | 5 - Strongly agree    |
|-----------------------------------------------------------------------------------|-----------------------|-----------------------|-----------------------|-----------------------|-----------------------|
| Children get more shots than are good for them.                                   | <input type="radio"/> | <input type="radio"/> | <input type="radio"/> | <input type="radio"/> | <input type="radio"/> |
| I believe that many of the illnesses shots prevent are severe.                    | <input type="radio"/> | <input type="radio"/> | <input type="radio"/> | <input type="radio"/> | <input type="radio"/> |
| It is better for my child to develop immunity by getting sick than to get a shot. | <input type="radio"/> | <input type="radio"/> | <input type="radio"/> | <input type="radio"/> | <input type="radio"/> |
| It is better for children to get fewer shots at the same time.                    | <input type="radio"/> | <input type="radio"/> | <input type="radio"/> | <input type="radio"/> | <input type="radio"/> |
| I trust the information I receive about shots.                                    | <input type="radio"/> | <input type="radio"/> | <input type="radio"/> | <input type="radio"/> | <input type="radio"/> |
| I am able to openly discuss my concerns about shots with my child's doctor.       | <input type="radio"/> | <input type="radio"/> | <input type="radio"/> | <input type="radio"/> | <input type="radio"/> |

7. On a scale of 1-5, where 1 is not at all concerned and 5 is extremely concerned, rate your concern about the following. Check one per question.

|                                                                                     | 1 - Not at all concerned | 2 - Not concerned     | 3 - Not sure          | 4 - Somewhat concerned | 5 - Extremely concerned |
|-------------------------------------------------------------------------------------|--------------------------|-----------------------|-----------------------|------------------------|-------------------------|
| How concerned are you that your child might have a serious side effect from a shot? | <input type="radio"/>    | <input type="radio"/> | <input type="radio"/> | <input type="radio"/>  | <input type="radio"/>   |
| How concerned are you that any one of the childhood shots might not be safe?        | <input type="radio"/>    | <input type="radio"/> | <input type="radio"/> | <input type="radio"/>  | <input type="radio"/>   |
| How concerned are you that a shot might not prevent the disease?                    | <input type="radio"/>    | <input type="radio"/> | <input type="radio"/> | <input type="radio"/>  | <input type="radio"/>   |

8. Overall, how hesitant about childhood shots would you consider yourself to be?

| Not at all hesitant   | Not too hesitant      | Not sure              | Somewhat hesitant     | Very hesitant         |
|-----------------------|-----------------------|-----------------------|-----------------------|-----------------------|
| <input type="radio"/> | <input type="radio"/> | <input type="radio"/> | <input type="radio"/> | <input type="radio"/> |

9. All things considered, how much do you trust your child's doctor? (choose one or choose no doctor, if no doctor)

| 0 - Do not trust at all | 1                     | 2                     | 3                     | 4                     | 5                     | 6                     | 7                     | 8                     | 9                     | 10 - Completely trust | No doctor             |
|-------------------------|-----------------------|-----------------------|-----------------------|-----------------------|-----------------------|-----------------------|-----------------------|-----------------------|-----------------------|-----------------------|-----------------------|
| <input type="radio"/>   | <input type="radio"/> | <input type="radio"/> | <input type="radio"/> | <input type="radio"/> | <input type="radio"/> | <input type="radio"/> | <input type="radio"/> | <input type="radio"/> | <input type="radio"/> | <input type="radio"/> | <input type="radio"/> |

10. What type of doctor do you visit?

- M.D.
- D.O.
- Naturopath
- I do not have a doctor

11. Have you ever known anyone who had a severe reaction to a shot? By severe we mean a reaction that made them get medical help.

- Yes
- No

12. Have you ever known anyone who got a disease that they could have gotten a shot for?

- Yes, they were hospitalized
- Yes, they needed a doctor
- Yes, they didn't need a doctor
- No

13. Have you ever taken a non-medical exemption for any or all of your children's shots?

- Yes
- No

14. If you have taken a non-medical exemption for your children's shots, what was your primary reason?

- I lost my child's shot records
- I did not have time to go to the doctor to get updated shots
- I do not believe my child should get shots

15. If you have taken a non-medical exemption for your children's shots, how did you obtain it?

- I researched and downloaded a form from the Internet
- I requested the paperwork from the school office
- The school office offered the form without me asking
- I saw the forms sitting in the office

Questions about you and your family

16. What is your gender?

- Male
- Female

17. What is your age?

18. What is your race/ethnicity (check all that apply)

- White
- Black/African American
- Asian/Pacific-islander
- American Indian/Alaskan Native
- Hispanic or Latino
- Other (please specify)

19. What is your marital status?

- Married
- Never married
- Not married, but living with partner
- Divorced or separated
- Widowed

20. What is your total annual household income range?

- Less than \$35,000
- \$35,000-49,999
- \$50,000-74,999
- \$75,000-99,999
- \$100,000 or greater

21. Are you employed?

- Yes
- No

22. If you have a spouse or partner living with you, are they employed?

- Yes
- No
- Not living with spouse or partner

23. What is the highest level of education you have completed?

- Less than 9th grade
- 9th to 12th grade
- High school graduate or GED
- Some college, but no degree
- Associate's degree
- Bachelor's degree
- Graduate or professional degree

24. What is the highest level of education for your spouse/partner living with you?

- No spouse/partner living with me
- Less than 9th grade
- 9th to 12th grade
- High school graduate or GED
- Some college, but no degree
- Associate's degree
- Bachelor's degree
- Graduate or professional degree

25. Do you have medical insurance that covers your child's shots?

- Yes, public insurance
- Yes, private insurance
- No

26. How many children live with you more than half the time?

27. Do you have any comments about shots that are needed for your child to go to school?





32. En una escala de 1-5, donde 1 es, "totalmente en desacuerdo" y 5 es, "muy de acuerdo", ¿que tanto estás de acuerdo con las siguientes afirmaciones?

|                                                                                                        | Totalmente en<br>desacuerdo | No de acuerdo         | No estoy segura/o     | De acuerdo            | Muy de acuerdo        |
|--------------------------------------------------------------------------------------------------------|-----------------------------|-----------------------|-----------------------|-----------------------|-----------------------|
| Los niños reciben más vacunas de las cuales son buenas para ellos.                                     | <input type="radio"/>       | <input type="radio"/> | <input type="radio"/> | <input type="radio"/> | <input type="radio"/> |
| Creo que muchas de las enfermedades prevenidas por las vacunas son graves.                             | <input type="radio"/>       | <input type="radio"/> | <input type="radio"/> | <input type="radio"/> | <input type="radio"/> |
| Es mejor para mi hijo desarrollar inmunidad por enfermarse que por recibir una vacuna.                 | <input type="radio"/>       | <input type="radio"/> | <input type="radio"/> | <input type="radio"/> | <input type="radio"/> |
| Es mejor que los niños reciben menos vacunas al mismo tiempo.                                          | <input type="radio"/>       | <input type="radio"/> | <input type="radio"/> | <input type="radio"/> | <input type="radio"/> |
| Confío en la información que recibo sobre las vacunas.                                                 | <input type="radio"/>       | <input type="radio"/> | <input type="radio"/> | <input type="radio"/> | <input type="radio"/> |
| Soy capaz de hablar abiertamente de mis preocupaciones acerca de las vacunas con el médico de mi hijo. | <input type="radio"/>       | <input type="radio"/> | <input type="radio"/> | <input type="radio"/> | <input type="radio"/> |

33. En una escala de 1-5, donde 1 es, "no preocupada/o en absoluto" y 5 es, "extremadamente preocupada/o", marque su preocupación por lo siguiente. Marque una por pregunta.

|                                                                                                             | No preocupada/o en<br>absoluto | No me preocupo<br>demasiado | No estoy segura/o     | Mas o menos me<br>preocupa | Extremadamente<br>preocupada/o |
|-------------------------------------------------------------------------------------------------------------|--------------------------------|-----------------------------|-----------------------|----------------------------|--------------------------------|
| ¿Qué tan preocupada/o está de que su hijo pueda tener un grave efecto secundario por resulta de una vacuna? | <input type="radio"/>          | <input type="radio"/>       | <input type="radio"/> | <input type="radio"/>      | <input type="radio"/>          |
| ¿Qué tan preocupada/o está de que cualquiera de las vacunas infantiles no podría ser seguro?                | <input type="radio"/>          | <input type="radio"/>       | <input type="radio"/> | <input type="radio"/>      | <input type="radio"/>          |
| ¿Qué tan preocupada/o está de que una vacuna no puede prevenir la enfermedad?                               | <input type="radio"/>          | <input type="radio"/>       | <input type="radio"/> | <input type="radio"/>      | <input type="radio"/>          |

34. En general, ¿que tan vacilante sobre las vacunas infantiles te considerarías?

No vacilante en absoluto

No tan vacilante

No segura/o

Algo vacilante

Muy vacilante

35. A final de cuentas, ¿que tanto confía usted en el médico de su hijo? (marque uno o revise ningún médico, si no tiene médico)

0 - No  
confío en  
absoluto

1

2

3

4

5

6

7

8

9

10 -  
Completamente  
confío

Ningún  
médico

36. ¿Qué tipo de médico visita usted?

D.M.

D.O.

Naturópata

Ningún médico

37. ¿Alguna vez has conocido a alguien que ha tenido una reacción grave a resultado de una vacuna? Por grave se entiende que fue una reacción que les hizo buscar ayuda médica.

Sí

No

38. ¿Alguna vez has conocido a alguien que tuvo una enfermedad la cual podrían haber recibido una vacuna anteriormente?

Sí, ellos fueron hospitalizados

Sí, necesitaban un medico

Sí, no necesitaron un medico

No

39. ¿Alguna vez ha tomado una exención no médica para todas o algunas de las vacunas de sus hijos?

Sí

No

40. Si usted ha tomado una exención no médica para las vacunas de sus hijos, ¿cuál fue la razón principal?

- Perdí los registros de vacunación de mi hijo
- No tuve tiempo para ir al médico para recibir vacunas actualizadas
- Yo no creo que mi hijo debe vacunarse

41. Si usted ha tomado una exención no médica para las vacunas de sus hijos, ¿cómo la obtuvo?

- Lo investigue y baje un formulario a través del Internet
- Yo pedí el papeleo de la oficina de la escuela
- La oficina de la escuela ofreció el formulario sin que lo solicitara
- Vi las formas accesibles en la oficina de la escuela

42. ¿Cuál es su sexo?

- Masculino
- Femenino

43. ¿Cuál es su edad?

44. ¿Cuál es su raza/etnicidad? (marque todas que apliquen)

- Blanco
- Negro/Afro Americano
- Asiático/Islas del Pacífico
- Indio Americano/Nativo de Alaska
- Hispana/o u Latina/o
- Otro (por favor, especifique)

45. Estado civil

- Casada/o
- Jamas casada/o
- No casada/o pero vivo con mi pareja
- Divorciada/o u separada/o
- Viuda/o

46. Ingreso familiar anual

- Menos de \$35,000
- \$35,000-49,999
- \$50,000-74,999
- \$75,000-99,999
- \$100,000 o más

47. ¿Está usted trabajando?

- Sí
- No

48. Si usted tiene un cónyuge o pareja que vive con usted, ¿están trabajando?

- Sí
- No
- No cónyuge o pareja que vive con usted

49. ¿Cuál es su nivel educativo más alto que se haya completado?

- Menos de 9º grado
- 9º al 12º grado
- Graduada/o de preparatoria / GED
- Algunos estudios universitarios, pero sin título
- Diploma de asociado/título a nivel medio
- Diploma de Bachiller/técnico
- Licenciatura o profesional

50. ¿Cuál es el nivel más alto de educación de su cónyuge / pareja que vive con usted?

- No tengo cónyuge / pareja viviendo conmigo
- Menos de 9º grado
- 9º al 12º grado
- Graduada/o de preparatoria / GED
- Algunos estudios universitarios, pero sin título
- Diploma de asociado/título a nivel medio
- Diploma de Bachiller/técnico
- Licenciatura o profesional

51. ¿Tiene seguro médico que cubra las vacunas de su hijo?

- Sí, seguro público
- Sí, seguro privado
- No

52. ¿Cuántos niños viven con usted más de la mitad del tiempo?

53. ¿Tiene algún comentario sobre las vacunas que se requieren para que su hijo vaya a la escuela?

Esto completa la encuesta. Muchas gracias por su participación. Para mostrar nuestro agradecimiento, por favor siga el enlace a continuación para poder enviarle un pequeño regalo de agradecimiento. Le recordamos que su identidad se mantendrá completamente separada y no conectaremos esta información en ninguna manera con las respuestas que ha proporcionado en la encuesta.

Gracias.

Haga clic [aquí](#) o copie <https://www.surveymonkey.com/s/datos> a tu navegador.

This completes the survey. Thank you very much for your participation. To show our appreciation, please follow the link below so we may send you a small gift of appreciation. Please note that your identity will be kept completely separate and we will not connect this information in any way to the answers provided in the survey.

Thank you.

[Click here](https://www.surveymonkey.com/s/rewardinfo) or copy **<https://www.surveymonkey.com/s/rewardinfo>** to your browser.
